# Supplementary material for: In situ fabrication of AgI/AgVO3 nanoribbon composites with enhanced visible photocatalytic activity for redox reactions
Source: Royal Society of Chemistry journal article supplement (doi:10.1039/c5cy00787a), 2015-08-07
Supplement: c5cy00787a1.pdf [file c5cy00787a1.pdf]

Electronic Supplementary Information for the manuscript

***In-Situ* Fabrication of AgI/AgVO<sub>3</sub> Nanoribbon Composites with Enhanced Visible  
Photocatalytic Activity for Redox Reactions**

Xiaohan Wang,<sup>a</sup> Juan Yang,<sup>\*a</sup> Shuqi Ma,<sup>a</sup> Dan Zhao,<sup>a</sup> Jun Dai,<sup>b</sup> Dafeng Zhang<sup>a</sup>

<sup>a</sup> *Institute of Applied Chemistry, Henan Polytechnic University, Jiaozuo, 454003, P.R. China*

<sup>\*</sup> *Corresponding Author. Tel.: +86 391-3987818; Fax: +86 391-3987811;*

*E-mail: yangjuanhpu@yahoo.com*

<sup>b</sup> *State Key Laboratory Cultivation Base for Gas Geology and Gas Control, School of Safety Science and Engineering, Henan Polytechnic University, Jiaozuo, 454003, P.R. China*

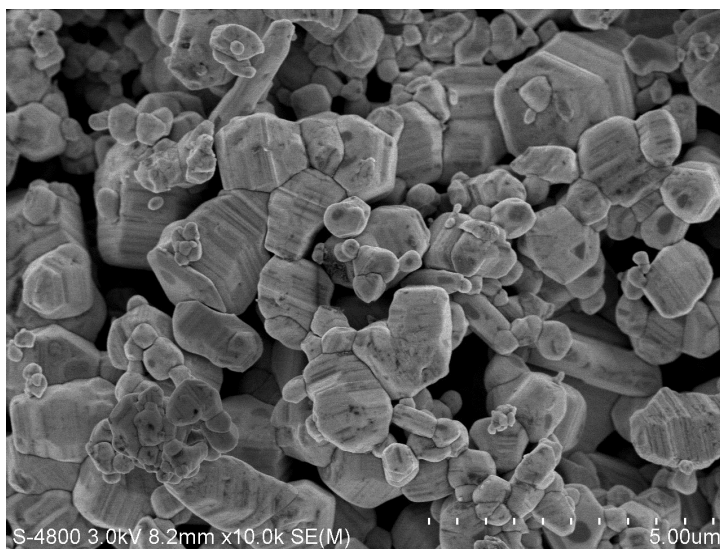

**Fig. S1** SEM image of pure AgI.

C:\Data\user\EX\New folder\2.spc 23-Mar-2015 13:45:18  
LSecs : 12

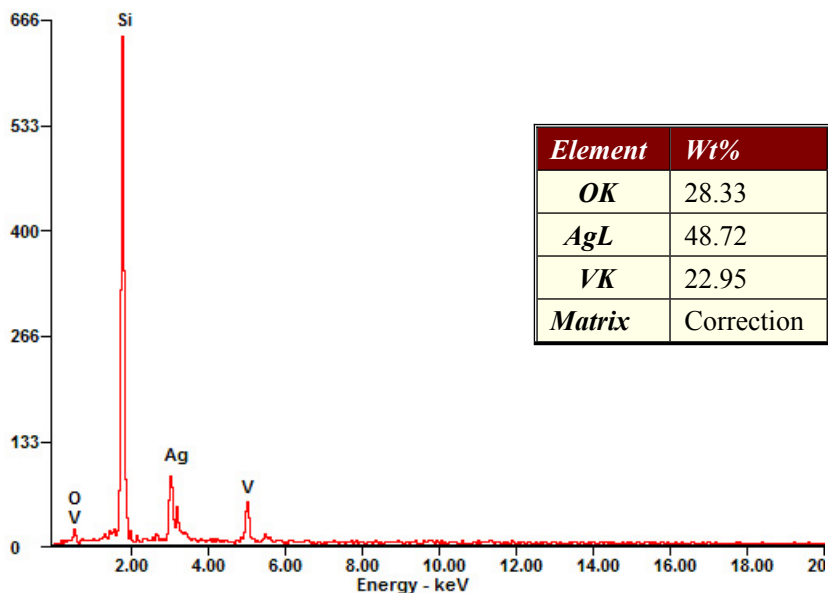

C:\Data\user\EX\New folder\1-3.spc 23-Mar-2015 13:43:53  
LSecs : 17

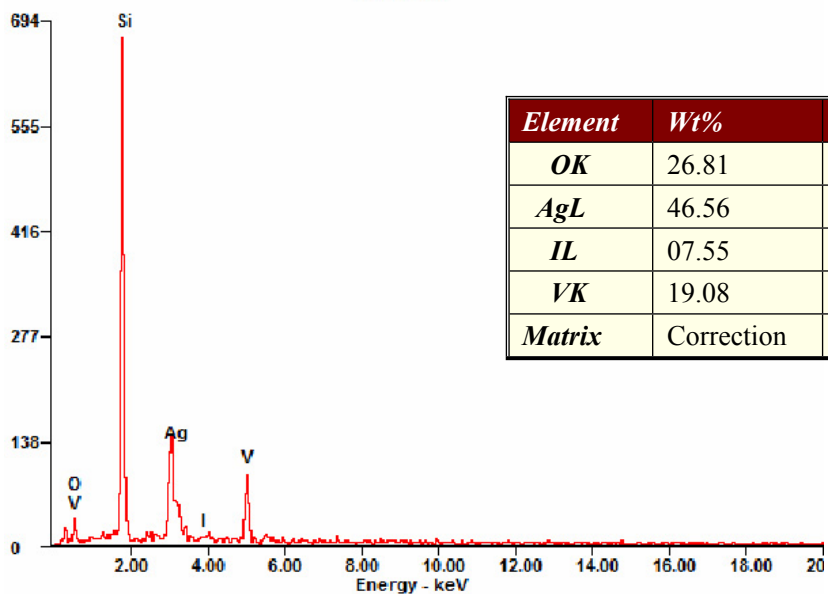

**Fig. S2** EDX patterns of  $\beta$ -AgVO<sub>3</sub> nanoribbon and 30% AgI/AgVO<sub>3</sub> nanocomposite (the Si element is attributable to the Si foil).

**Fig. S3** GC and GC-MS data for representative compounds in Table 2.

GC and GC-MS data for Entry 1 in Table 2.

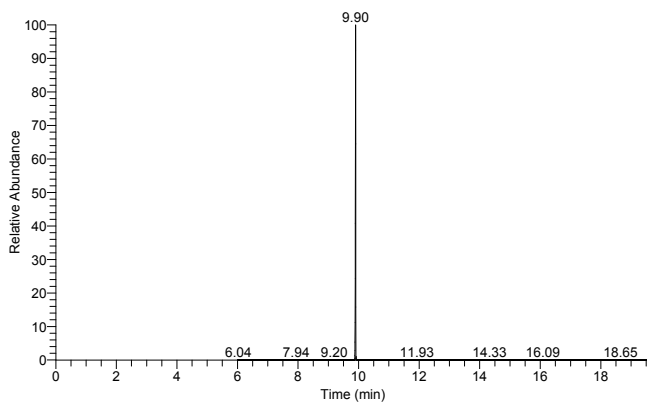

1a) GC spectrum of standard sample benzylamine.

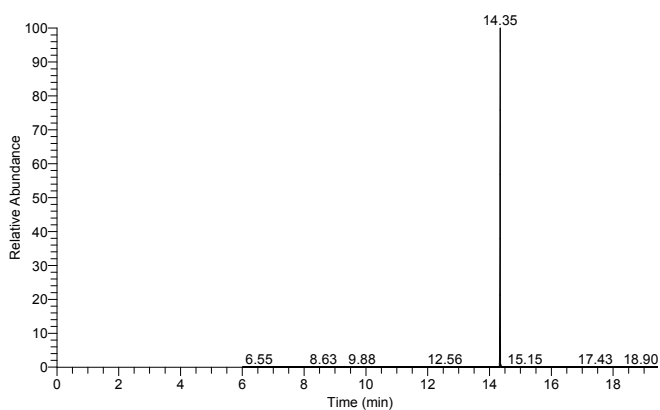

1b) GC spectrum of standard sample N-benzylidenebenzylamine (product of benzylamine oxidation).

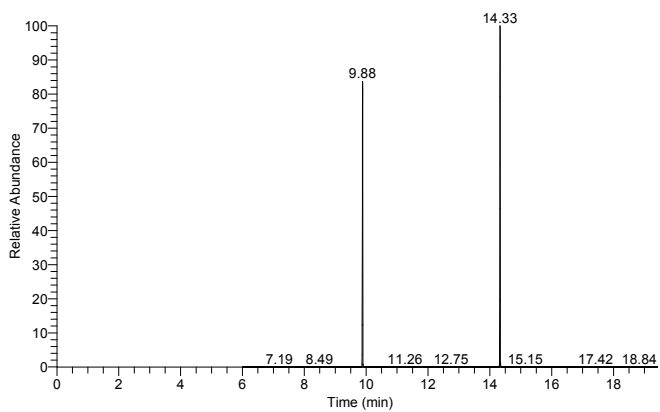

1c) GC spectrum of benzylamine oxidation (entry 1) after 6 h visible light irradiation.

BA-070917 #1143 RT: 9.88 AV: 1 NL: 3.45E8  
T: {0,0} + c EI Full ms [50.00-300.00]

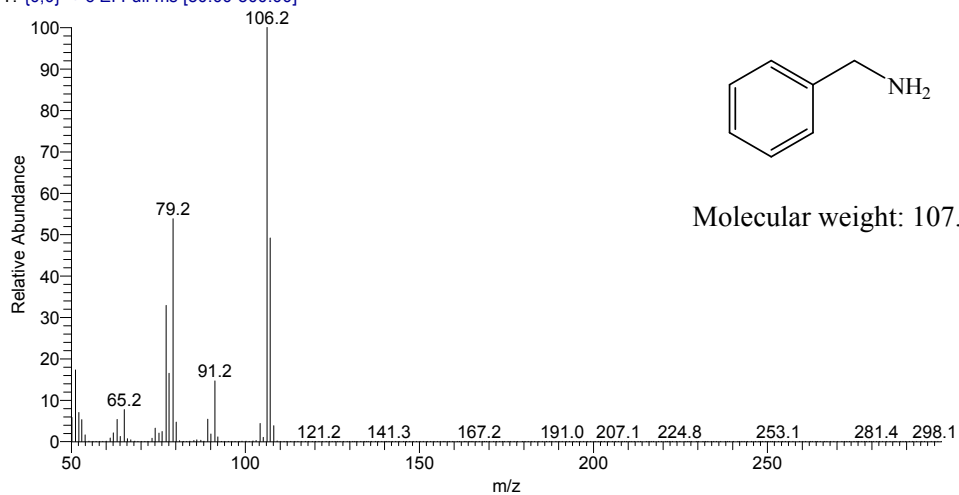

1d) MS data of the above Figure 1c.

BA-070917 #2450 RT: 14.33 AV: 1 NL: 5.24E8  
T: {0,0} + c EI Full ms [50.00-300.00]

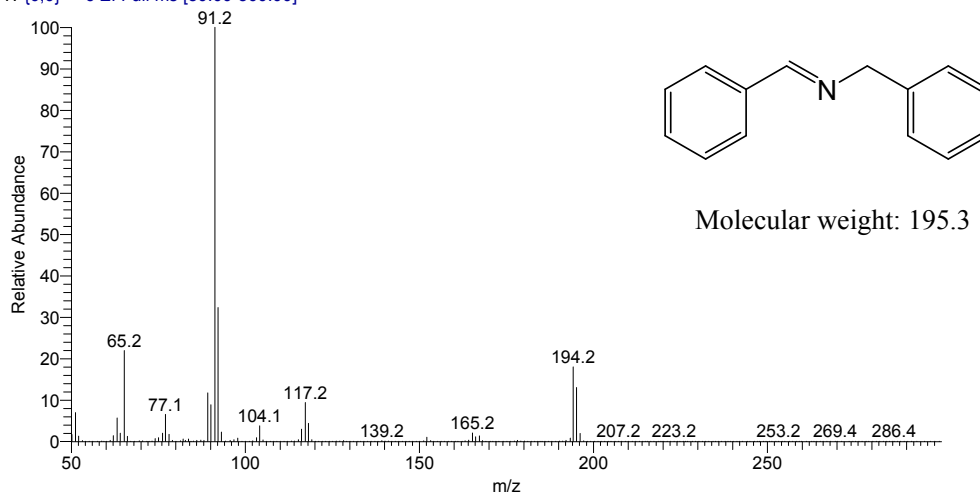

1e) MS data of the above Figure 1c.

GC and GC-MS data for Entry 2 in Table 2.

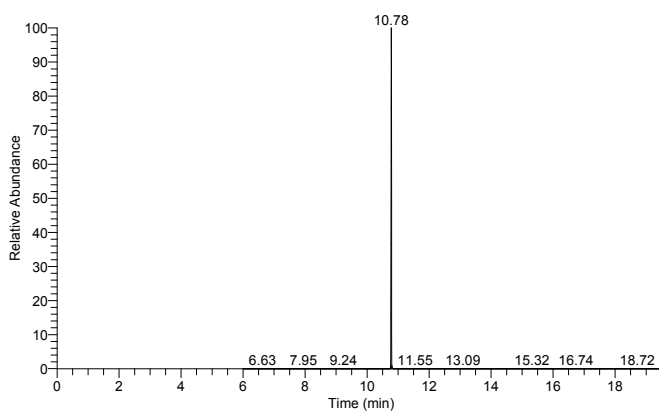

2a) GC spectrum of standard sample *p*-methyl-benzylamine.

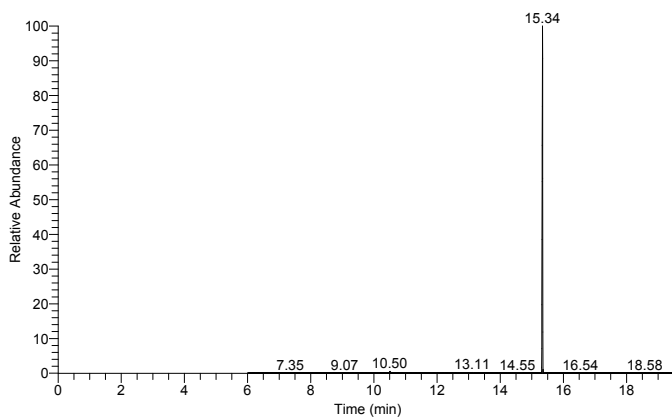

2b) GC spectrum of standard sample  $\text{CH}_3\text{C}_6\text{H}_4\text{CH}=\text{NCH}_2\text{C}_6\text{H}_4\text{CH}_3$  (the product of *p*-methyl-benzylamine oxidation).

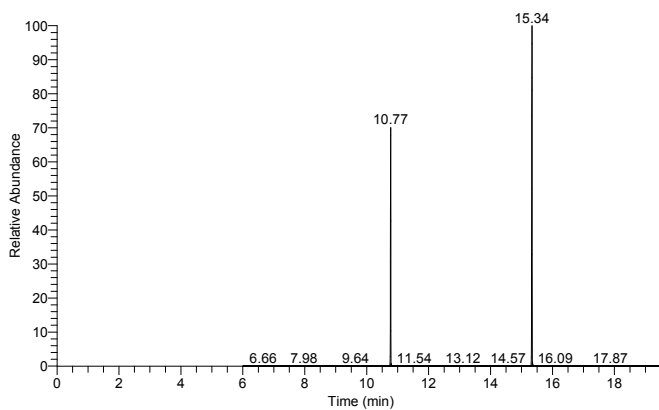

2c) GC spectrum of *p*-methyl-benzylamine oxidation (entry 2) after 5.5 h visible light irradiation.

BA-070919 #1404 RT: 10.77 AV: 1 NL: 2.40E8  
T: {0,0} + c EI Full ms [50.00-300.00]

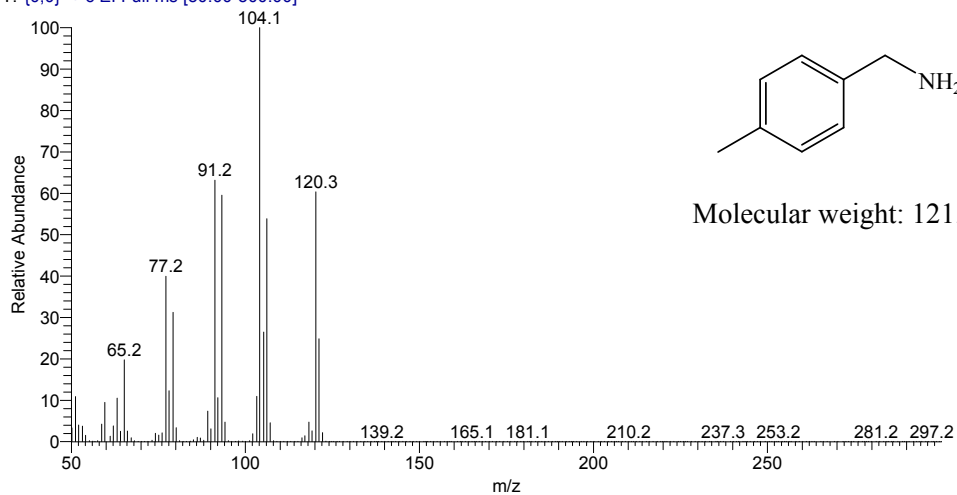

2d) MS data of the above Figure 2c.

BA-070919 #2746 RT: 15.34 AV: 1 NL: 6.45E8  
T: {0,0} + c EI Full ms [50.00-300.00]

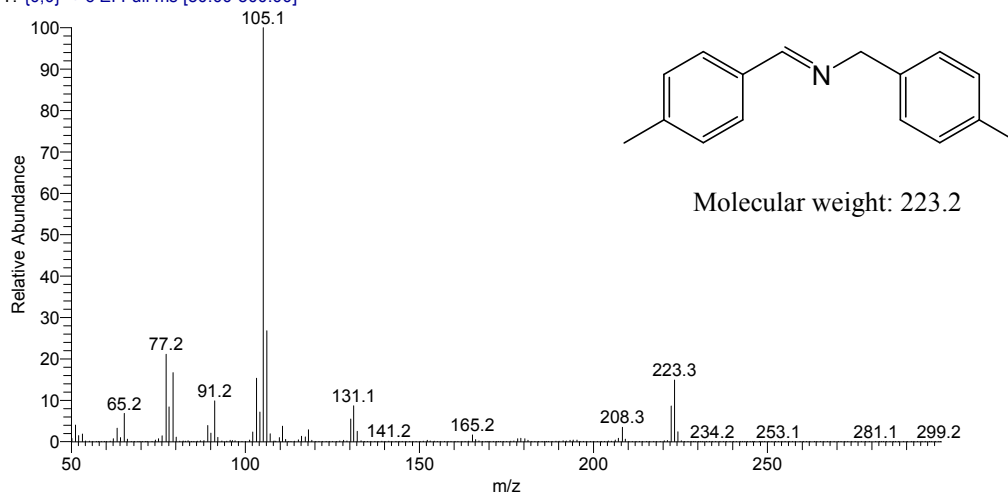

2e) MS data of the above Figure 2c.

GC and GC-MS data for Entry 5 in Table 2.

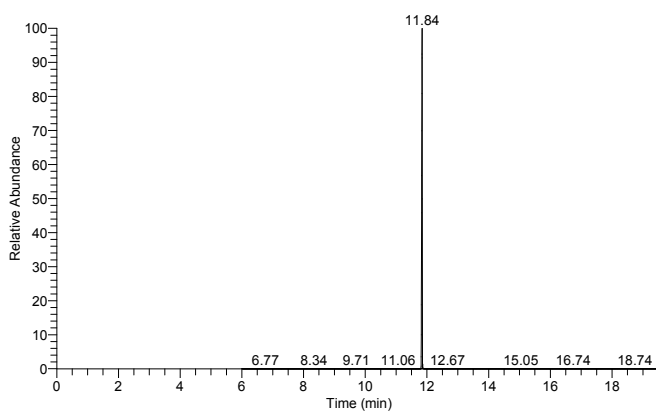

5a) GC spectrum of standard sample *p*-methoxyl-benzylamine.

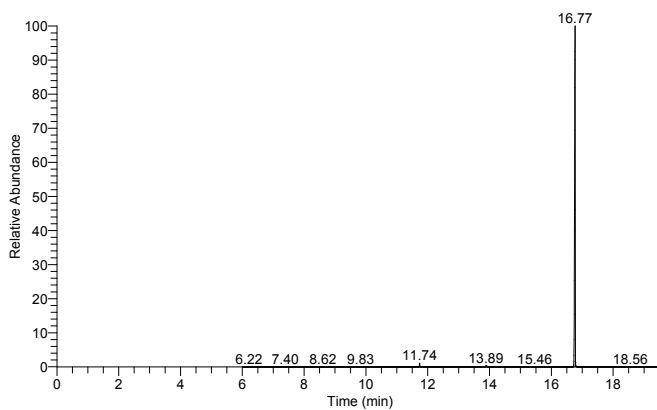

5b) GC spectrum of standard sample  $\text{CH}_3\text{OC}_6\text{H}_4\text{CH}=\text{NCH}_2\text{C}_6\text{H}_4\text{OCH}_3$  (the product of *p*-methoxyl - benzylamine oxidation).

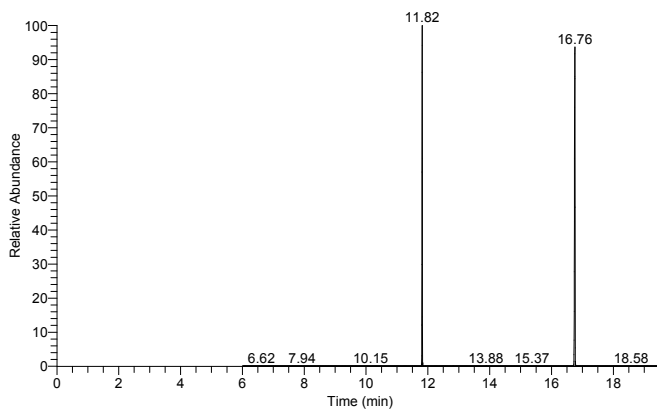

5c) GC spectrum of *p*-methoxyl-benzylamine oxidation (entry 5) after 3.5 h visible light irradiation.

BA-070921 #1711 RT: 11.82 AV: 1 NL: 2.00E8  
T: {0,0} + c EI Full ms [50.00-300.00]

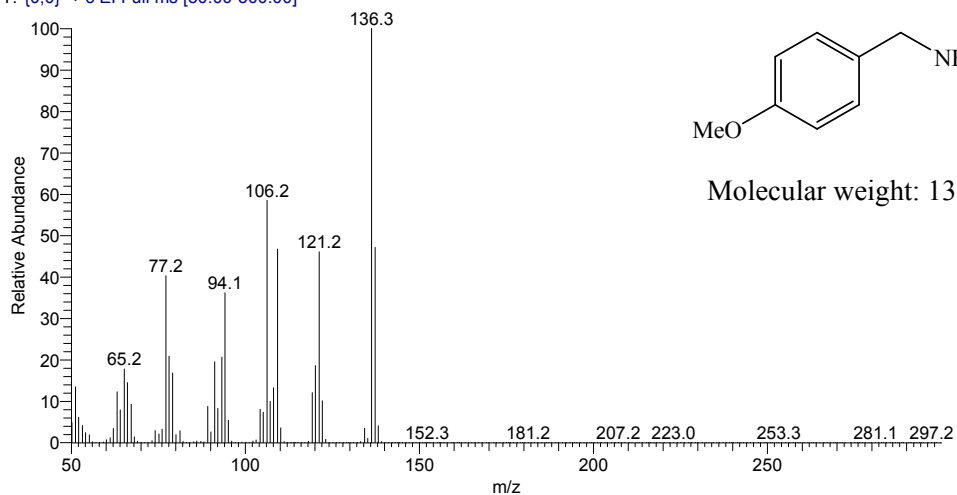

5d) MS data of the above Figure 5c.

BA-070921 #3162 RT: 16.75 AV: 1 NL: 5.63E8  
T: {0,0} + c EI Full ms [50.00-300.00]

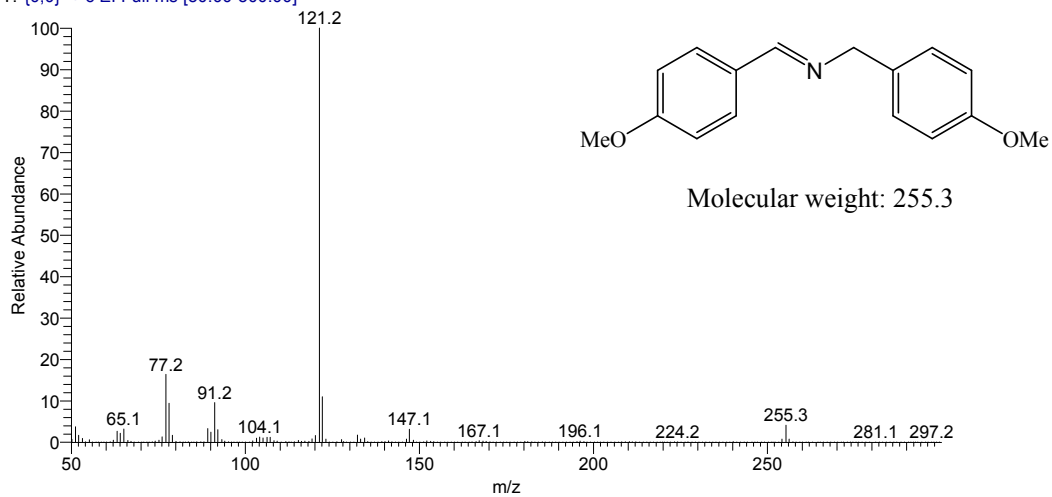

5e) MS data of the above Figure 5c.



GC and GC-MS data for Entry 6 in Table 2.

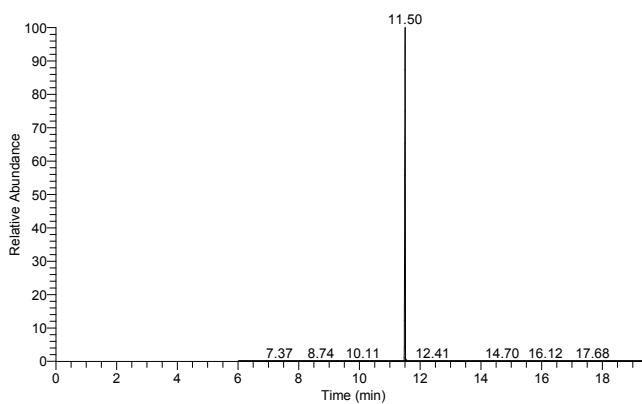

6a) GC spectrum of standard sample *p*-chlorobenzylamine.

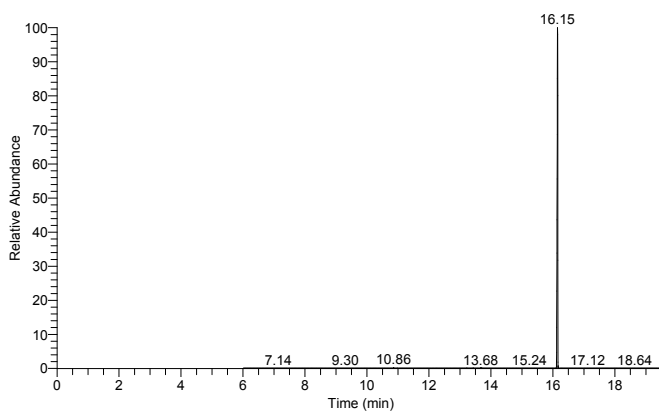

6b) GC spectrum of standard sample  $\text{ClC}_6\text{H}_4\text{CH}=\text{NCH}_2\text{C}_6\text{H}_4\text{Cl}$  (the product of *p*-chlorobenzylamine oxidation).

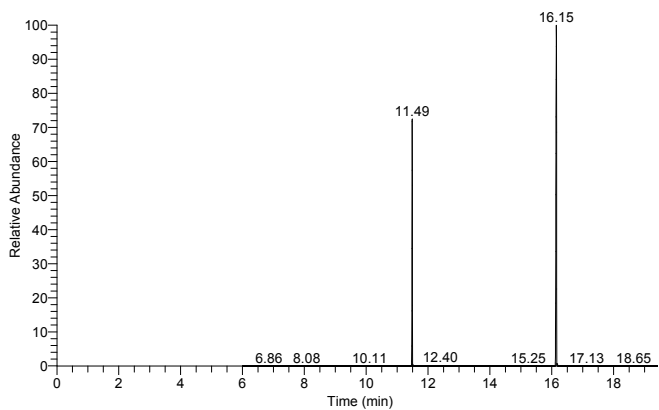

6c) GC spectrum of *p*-chlorobenzylamine oxidation (entry 6) after 7 h visible light irradiation.

BA-070918 #1613 RT: 11.49 AV: 1 NL: 3.61E8  
T: {0,0} + c EI Full ms [50.00-300.00]

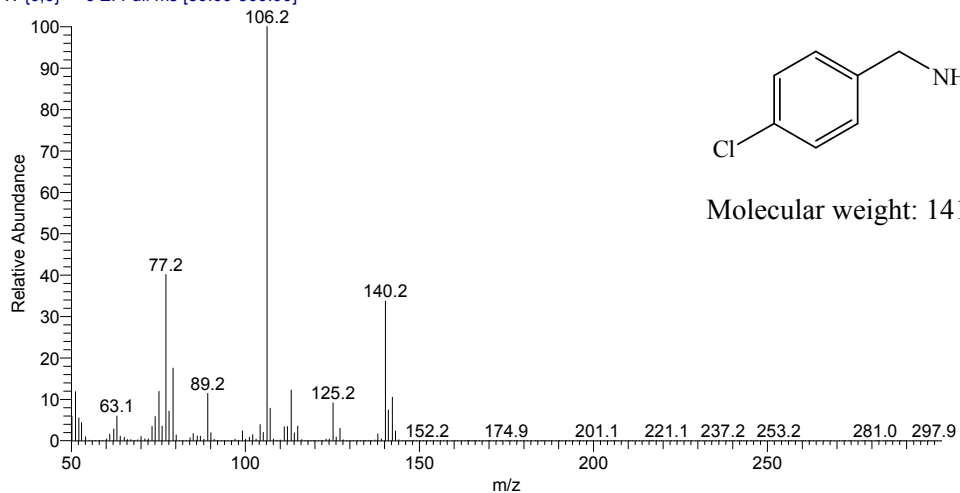

6d) MS data of the above Figure 6c.

BA-070908\_150709134343 #2984 RT: 16.15 AV: 1 NL: 6.24E8  
T: {0,0} + c EI Full ms [50.00-300.00]

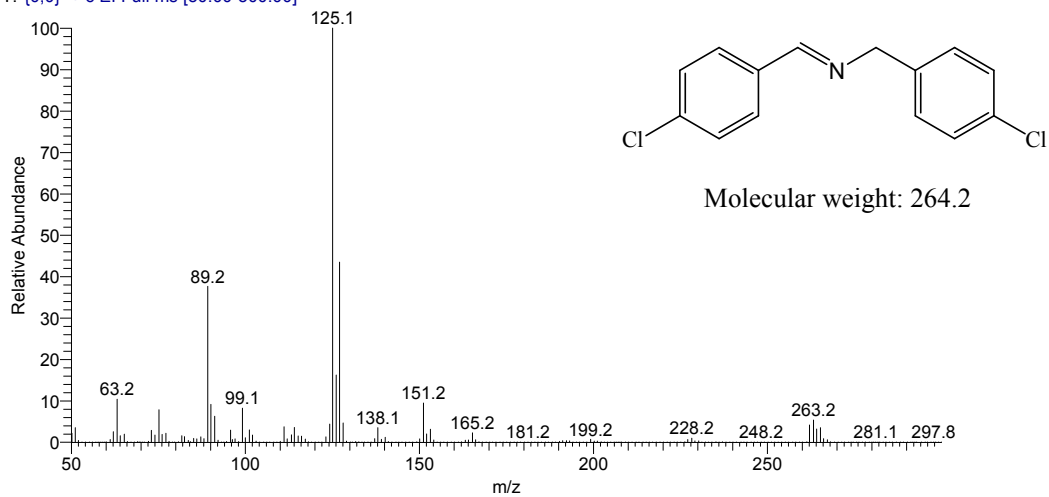

6e) MS data of the above Figure 6c.

GC and GC-MS data for Entry 7 in Table 2.

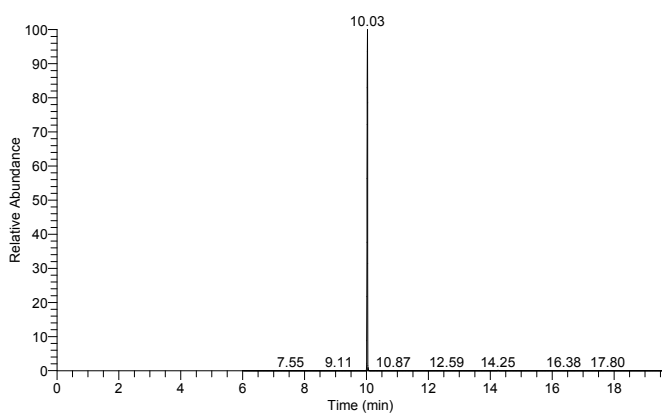

7a) GC spectrum of standard sample *p*-fluorobenzylamine.

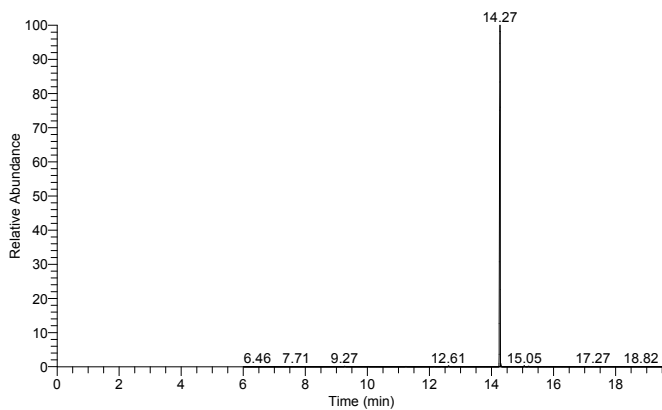

7b) GC spectrum of standard sample  $\text{FC}_6\text{H}_4\text{CH}=\text{NCH}_2\text{C}_6\text{H}_4\text{F}$  (the product of *p*-fluorobenzylamine oxidation).

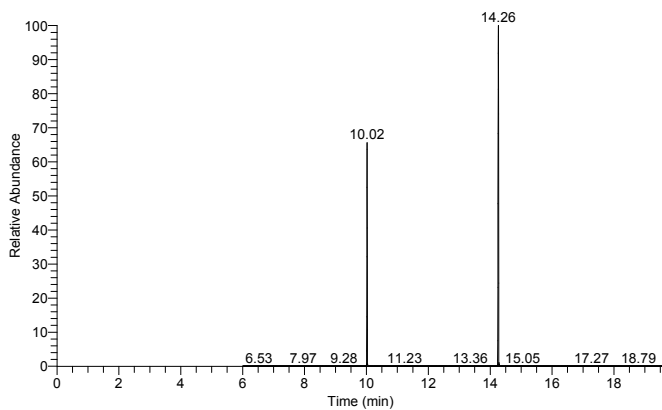

7c) GC spectrum of *p*-fluorobenzylamine oxidation (entry 7) after 7 h visible light irradiation.

BA-070920 #1183 RT: 10.02 AV: 1 NL: 2.21E8  
T: {0,0} + c EI Full ms [50.00-300.00]

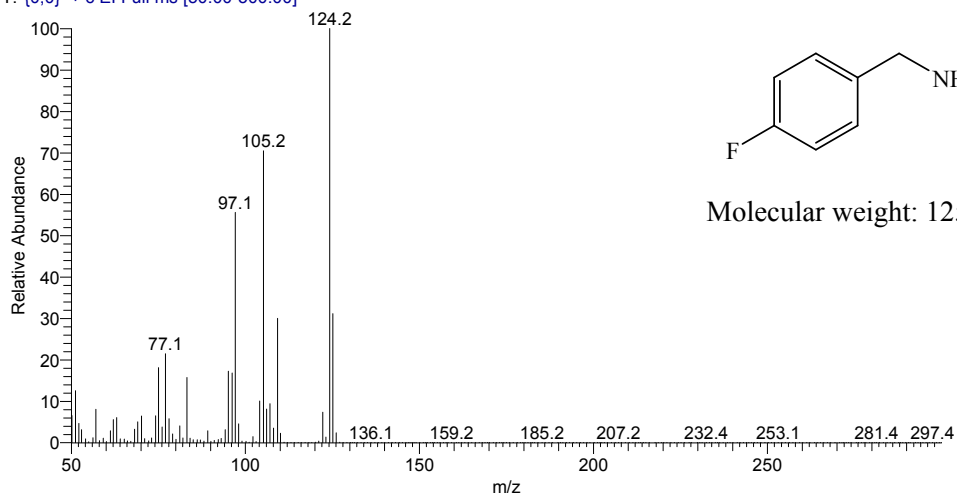

7d) MS data of the above Figure 7c.

BA-070920 #2430 RT: 14.26 AV: 1 NL: 6.17E8  
T: {0,0} + c EI Full ms [50.00-300.00]

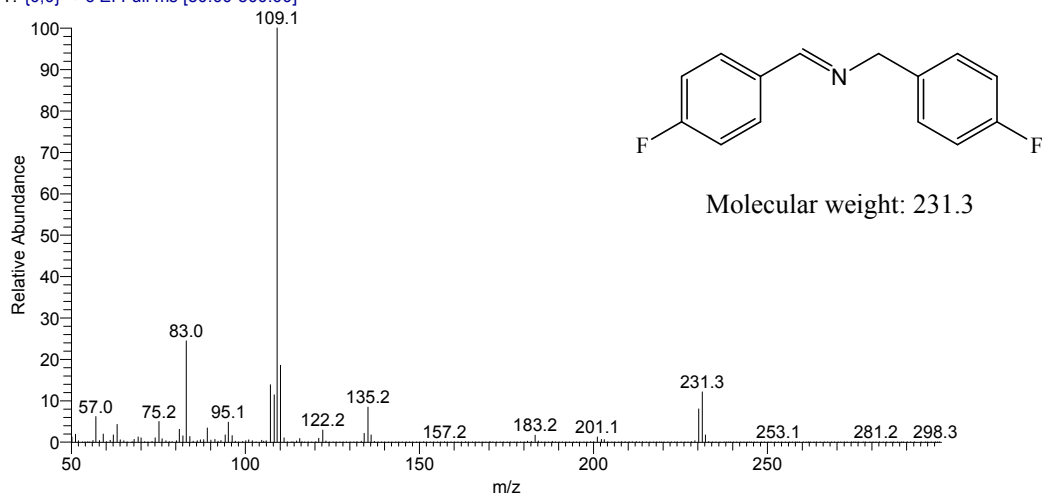

7e) MS data of the above Figure 7c.

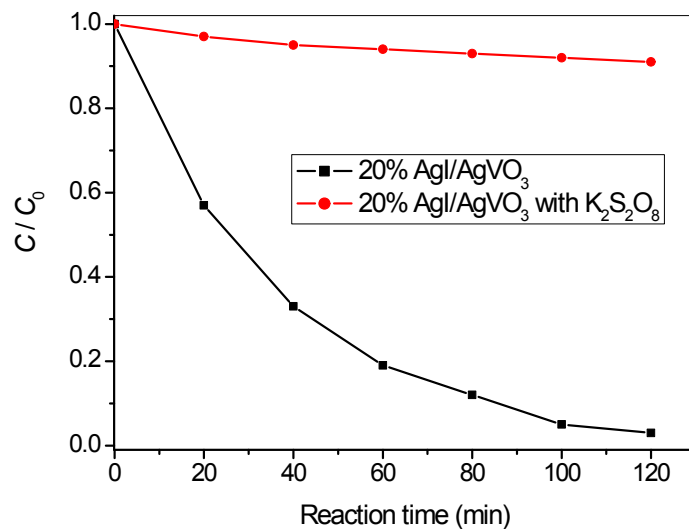

**Fig. S4** Controlled experiment for photocatalytic reduction of Cr(VI) over 20% AgI/AgVO<sub>3</sub> nanocomposites under visible light irradiation with addition of K<sub>2</sub>S<sub>2</sub>O<sub>8</sub> (0.1 mmol) as a scavenger for photoinduced electrons.

**Table S1** EDX results of 20% AgI/AgVO<sub>3</sub> sample after different reaction time.

| Catalyst                                 | Atomic content (at. %)                  |       |      |       |                 |
|------------------------------------------|-----------------------------------------|-------|------|-------|-----------------|
|                                          | Ag (Ag <sup>+</sup> + Ag <sup>0</sup> ) | V     | I    | O     | Ag <sup>0</sup> |
| 20% AgI/AgVO <sub>3</sub>                | 15.74                                   | 14.42 | 1.29 | 68.55 | --              |
| 20% AgI/AgVO <sub>3</sub> after 1.5 h    | 17.07                                   | 13.96 | 1.22 | 67.75 | 1.89            |
| 20% AgI/AgVO <sub>3</sub> after 1 cycle  | 17.16                                   | 13.88 | 1.17 | 67.79 | 2.11            |
| 20% AgI/AgVO <sub>3</sub> after 4 cycles | 17.35                                   | 14.01 | 1.15 | 67.49 | 2.19            |

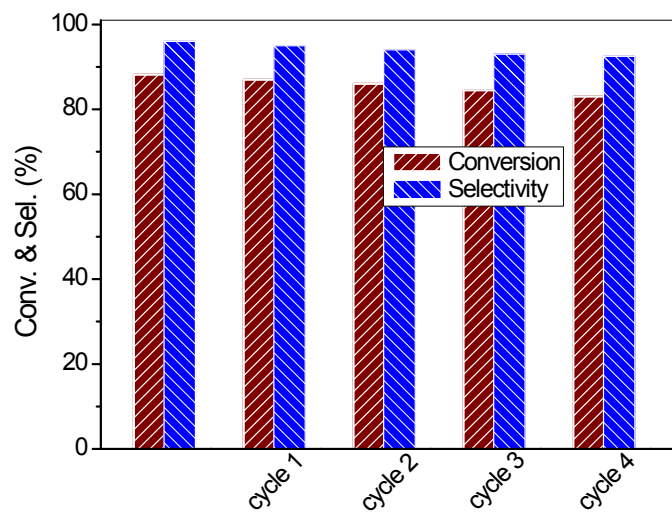

**Fig. S5** Cycle runs of the optimum sample 20% AgI/AgVO<sub>3</sub> toward selective oxidation of benzylamine under visible light irradiation for 12 h.
